# Supplementary material for: VpRFP1, a novel C4C4-type RING finger protein gene from Chinese wild Vitis pseudoreticulata, functions as a transcriptional activator in defence response of grapevine
Source: PubMed Central journal article supplement — J Exp Bot. 2011 Aug 23;62(15):5671–82. doi: 10.1093/jxb/err253 (PMC3223060; doi:10.1093/jxb/err253), 2011-08-23
Supplement: supp_err253_00065482_file001.pdf [file supp_err253_00065482_file001.pdf]

## Supplementary material

### Supplemental Table S1 Primers used for amplify the target gene

Table S1 Primers used for amplify the target gene

| Name of deletion fragment | oligonucleotide primers                                                              | length |
|---------------------------|--------------------------------------------------------------------------------------|--------|
| VpRFP1-A                  | 5'-AGATCTGCATGATTACCGATTCGATCACCAGC-3'<br>5'-GTGCAGCTAAGACCTTGCAATCATGCTATAAGAG-3'   | 1053bp |
| VpRFP1-B                  | 5'-AGATCTGCAAGAAGAAGAGGACGAACAGGACA-3'<br>5'-GTGCAGCTAAGACCTTGCAATCATGCTATAAGAG-3'   | 999bp  |
| VpRFP1-C                  | 5'-AGATCTGCATGATTACCGATTCGATCACCAGC-3'<br>5'-GTGCAGTTCCTGCAACCTGGACAGCG-3'           | 953bp  |
| VpRFP1-D                  | 5'-AGATCTGCAACAATGGATGTAGGGGAGAATCG-3'<br>5'-GTGCAGCTAAGACCTTGCAATCATGCTATAAGAG-3'   | 915bp  |
| VpRFP1-E                  | 5'-AGATCTGCAAGAAGAAGAGGACGAACAGGACA-3'<br>5'-GTGCAGTTCCTGCAACCTGGACAGCG-3'           | 897bp  |
| VpRFP1-F                  | 5'-AGATCTGCAACAATGGATGTAGGGGAGAATCG-3'<br>5'-GTGCAGTTCCTGCAACCTGGACAGCG-3'           | 822bp  |
| VpRFP1-G                  | 5'-AGATCTGCAACAATGGATGTAGGGGAGAATCG-3'<br>5'-GTGCAGTTCCTGCAACCTGGACAGCG-3'           | 813bp  |
| VpRFP1-H                  | 5'-AGATCTGCAAGAAGAAGAGGACGAACAGGACA-3'<br>5'-GTGCAGTTCCTGCAACCTGGACAGCG-3'           | 768bp  |
| VpRFP1-I                  | 5'-AGATCTGCAACAATGGATGTAGGGGAGAATCG-3'<br>5'-GTGCAGTTCCTGCAACCTGGACAGCG-3'           | 684bp  |
| VpRFP1-J                  | 5'-AGATCTGCTGCCCCATATGCTATGAAGATTTGG-3'<br>5'-GTGCAGCTAAGACCTTGCAATCATGCTATAAGAG-3'  | 231bp  |
| VpRFP1-K                  | 5'-AGATCTGCATGATTACCGATTCGATCACCAGC-3'<br>5'-GTGCAGCTTGACTTTGGAAAGCCATTGCTC-3'       | 138bp  |
| VpRFP1-L                  | 5'-AGATCTGCTGCCCCATATGCTATGAAGATTTGG-3'<br>5'-GTGCAGTTCCTGCAACCTGGACAGCG-3'          | 129bp  |
| VpRFP1-M                  | 5'-AGATCTGCAAGCCATATGATTGTGATCCTGTTGG-3'<br>5'-GTGCAGCTAAGACCTTGCAATCATGCTATAAGAG-3' | 102bp  |
| VpRFP1-N                  | 5'-AGATCTGCAAGAAGAAGAGGACGAACAGGACA-3'<br>5'-GTGCAGCTTGACTTTGGAAAGCCATTGCTC-3'       | 84bp   |
| VpRFP1-O                  | 5'-AGATCTGCATGATTACCGATTCGATCACCAGC-3'<br>5'-GTGCAGGCCGAACCTCTTAGAGATCGAG-3'         | 54bp   |

Supplemental Table S2 Primers used for RT-PCR and Real-time PCR analysis of gene expression

Table 2 Primers used for RT-PCR and Real-time PCR analysis of gene expression

| Name     | Accession no. | Forward primer sequences (5'-3') | Reverse primer sequences (5'-3') |
|----------|---------------|----------------------------------|----------------------------------|
| VpRFP1   | FJ356672      | GCAAACAGTCCCACAAGTC              | CTGAACAACACCCACCACT              |
| VvGAPDH  | EF192466      | TTCACTGACAAGGACAAGGC             | CCAACAACGAACATAGGAGC             |
| AtPR1    | At2g14610     | CCACAAGATTATCTAAGGG              | CCTGCATATGATGGCTCCT              |
| AtPR2    | At3g57260     | CCACCAATGTTGATGATTCTTCT          | ATACTCATCCCTGAACCTTCCTT          |
| AtPR3    | At3g12500     | CGCTACTACGGAAGAGGACC             | TTACCACCAGGATTAACACCA            |
| AtPDF1.2 | At5g44420     | TAATCATCATGGCTAAGTTTGCTT         | ATACACACGATTTAGCACCAAAGA         |
| AtActin  | NM_179953     | CGATGAAGCTCAATCCAAACGA           | CAGAGTCGAGCACAATACCG             |

Supplemental Fig. S1

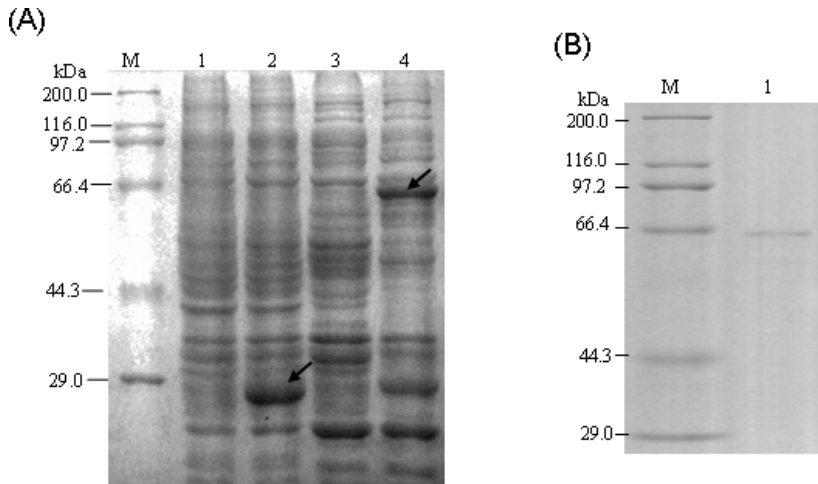

Fig. S1 *VpRFP1* express in *E. coli* and purification of GST/*VpRFP1* fusion protein. (A) The result of SDS-PAGE of expression of fusion protein GST/*VpRFP1*. M: Protein marker, 1: The control of not added IPTG, 2: The control induced 4h with 0.1mM IPTG, 3: The recombinant sample with no IPTG induced, 4: The recombinant sample induced 4 h with 0.1mM IPTG; (B) purification of the GST/*VpRFP1* fusion protein. M: Protein marker, 1: purification product of GST/*VpRFP1* fusion protein.
